# Supplementary material
Source: bioRxiv or medRxiv preprint supplement (https://www.biorxiv.org/highwire/filestream/17135/field_highwire_adjunct_files/0/062455-1.pdf)
Supplement: Supplementary file [file 062455-1.pdf]

## SUPPORTING INFORMATION

**Figure S1.**  $CpG_{O/E}$  distributions for 123 insect species. Gaussian mixture modeling was performed in R v2.3.4 to estimate uni- and bimodality. The dashed line represents the mean of each distribution, and the shaded area is the 95% confidence interval around the mean.

**Figure S2.** Character state transition matrices from Pagel's test for evolutionary dependence between two binary traits. Transition rates between states are given for independent and dependent models of evolution. Greyed rates represent a rate of zero (0) between states.

**Figure S3.** Genomic levels of DNA methylation are a good predictor of genic levels of DNA methylation. Linear regression between genomic and genic levels of DNA methylation for 22 species of insects with sequenced genomes.

**Table S1.** Species and accompanying behavior, genomic, DNA methylation and sequencing information used in this study.

**Table S2.** Species and DNA methyltransferase (DNMT) accession id's used in Figure 3.

**Table S3.** A list of proteins used to estimate multilocus coalescent trees and the best BLAST hit to *Apis mellifera* or *Drosophila melanogaster*.

## REFERENCES

1. Uzsák, A. & Schal, C. Sensory cues involved in social facilitation of reproduction in *Blattella germanica* females. *PLoS One* **8**, e55678 (2013).
2. Scott, M. P. The ecology and behavior of burying. *Annu. Rev. Entomol.* **43**, 595–618 (1998).
3. Attardo, G. M. *et al.* The homeodomain protein ladybird late regulates synthesis of milk proteins during pregnancy in the tsetse fly (*Glossina morsitans*). *PLoS Negl. Trop. Dis.* **8**, e2645 (2014).
4. Blackman, R. L., Eastop, V. F. & Natural History Museum (London, E. Aphids on the world's crops: an identification and information guide. (John Wiley & Sons Inc, 2000).
5. Tsuji, K. & Yamauchi, K. Production of females by parthenogenesis in the ant, *Cerapachys biroi*. *Insectes Soc.* **42**, 333–336 (1995).
6. Strand, M. R. & Grbic, M. The development and evolution of polyembryonic insects. *Curr. Top. Dev. Biol.* **35**, 121–159 (1997).
7. Monnin, T. & Peeters, C. Monogyny and regulation of worker mating in the queenless ant *Dinoponera quadriceps*. *Anim. Behav.* **55**, 299–306 (1998).
8. Dressler, R. L. Euglossine bees (Hymenoptera: Apidae) of the Tambopata reserved zone, Madre de Dios, Perú. *Rev Peruana Entomol* **27**, 75-79 (1985).
9. Kocher, S. D. *et al.* The draft genome of a socially polymorphic halictid bee, *Lasioglossum albipes*. *Genome Biol.* **14**, R142 (2013).
